# Supplementary material for: T cell immunity of the nonadjuvanted HLA-restricted peptide COVID-19 vaccine
Source: Research Square preprint supplement (doi:10.21203/rs.3.rs-2119898/v1), 2023-03-14
Supplement: Supplementary file 1 [file 2ac6e735e905c9e4b408eb38.xlsx]

## Sheet: Table 1
HLA-A									HLA-B									HLA-C
allele	seq_num	start	end	length	peptide	ic50	rank		allele	seq_num	start	end	length	peptide	ic50	rank		allele	seq_num	start	end	length	peptide	ic50	rank
HLA-A*02:01	2	1	9	9	KLNSGLSKV	51.4174	0.9		HLA-B*15:02	1	1	9	9	KLNSGDSKV	1303.86	58		HLA-C*12:03	1	1	9	9	KLNSGDSKV	28.9208	41
HLA-A*02:06	2	1	9	9	KLNSGLSKV	78.986	2.6		HLA-B*15:02	2	1	9	9	KLNSGLSKV	1880.31	68		HLA-C*12:03	2	1	9	9	KLNSGLSKV	28.9208	41
HLA-A*02:01	1	1	9	9	KLNSGDSKV	167.923	2.4		HLA-B*40:01	2	2	9	8	LNSGLSKV	2966.88	3.5		HLA-C*05:01	1	1	9	9	KLNSGDSKV	45.9907	5
HLA-A*02:06	1	1	9	9	KLNSGDSKV	267.639	7.1		HLA-B*40:02	2	2	9	8	LNSGLSKV	3210.92	9.1		HLA-C*05:01	2	1	9	9	KLNSGLSKV	81.9728	7.2
HLA-A*30:02	2	1	9	9	KLNSGLSKV	838.417	2.7		HLA-B*07:02	2	1	8	8	KLNSGLSK	4688.24	15		HLA-C*14:02	1	1	9	9	KLNSGDSKV	148.464	33
HLA-A*30:02	1	1	9	9	KLNSGDSKV	998.757	3.2		HLA-B*07:02	2	2	9	8	LNSGLSKV	4886.64	15		HLA-C*14:02	2	1	9	9	KLNSGLSKV	148.464	33
HLA-A*30:01	2	1	9	9	KLNSGLSKV	1577.5	16		HLA-B*51:01	1	2	9	8	LNSGDSKV	5110.22	4.2		HLA-C*15:02	2	1	9	9	KLNSGLSKV	938.469	32
HLA-A*03:01	2	1	9	9	KLNSGLSKV	2311	4.8		HLA-B*40:02	1	2	9	8	LNSGDSKV	6333.3	18		HLA-C*15:02	1	1	9	9	KLNSGDSKV	1052.98	33
HLA-A*11:01	1	1	8	8	KLNSGDSK	2386.49	4.1		HLA-B*07:02	1	2	9	8	LNSGDSKV	8072.54	22		HLA-C*03:03	1	1	9	9	KLNSGDSKV	3338.95	98
HLA-A*30:01	1	1	9	9	KLNSGDSKV	2420.86	21		HLA-B*07:02	1	1	8	8	KLNSGDSK	9440.83	25		HLA-C*07:01	2	1	9	9	KLNSGLSKV	3708.26	61
HLA-A*30:02	1	1	8	8	KLNSGDSK	2614.57	5		HLA-B*18:01	2	2	9	8	LNSGLSKV	9690.81	27		HLA-C*08:02	2	1	9	9	KLNSGLSKV	5796.42	72
HLA-A*30:02	2	1	8	8	KLNSGLSK	2614.57	5		HLA-B*15:01	2	1	9	9	KLNSGLSKV	11402.5	28		HLA-C*07:01	1	1	9	9	KLNSGDSKV	7398.95	76
HLA-A*31:01	2	1	9	9	KLNSGLSKV	2821.43	12		HLA-B*15:01	1	1	9	9	KLNSGDSKV	11561.1	28		HLA-C*03:03	2	1	9	9	KLNSGLSKV	7561.54	100
HLA-A*32:01	2	1	9	9	KLNSGLSKV	2984.97	11		HLA-B*18:01	1	2	9	8	LNSGDSKV	12513	32		HLA-C*08:02	1	1	9	9	KLNSGDSKV	8397.69	85
HLA-A*11:01	2	1	8	8	KLNSGLSK	3441.6	5.8		HLA-B*58:02	1	1	9	9	KLNSGDSKV	13382	20		HLA-C*04:01	1	1	9	9	KLNSGDSKV	12343	17
HLA-A*02:06	2	2	9	8	LNSGLSKV	3565.66	16		HLA-B*27:05	2	1	8	8	KLNSGLSK	13443.1	20		HLA-C*04:01	2	1	9	9	KLNSGLSKV	12343	17
HLA-A*32:01	1	1	9	9	KLNSGDSKV	4139.42	13		HLA-B*08:01	2	1	8	8	KLNSGLSK	16107.6	43		HLA-C*06:02	2	1	9	9	KLNSGLSKV	16436.5	40
HLA-A*31:01	1	1	9	9	KLNSGDSKV	5134.17	15		HLA-B*08:01	1	1	8	8	KLNSGDSK	16712.1	44
HLA-A*03:01	1	1	9	9	KLNSGDSKV	6711.2	9.3		HLA-B*35:01	1	2	9	8	LNSGDSKV	17362.8	8.8
HLA-A*02:06	1	2	9	8	LNSGDSKV	7263.4	23		HLA-B*58:02	2	1	9	9	KLNSGLSKV	18600.3	28
HLA-A*01:01	1	2	9	8	LNSGDSKV	7567.28	9.4		HLA-B*40:01	1	1	8	8	KLNSGDSK	18936.5	32
HLA-A*02:01	2	2	9	8	LNSGLSKV	8207.48	27		HLA-B*40:01	2	1	8	8	KLNSGLSK	18936.5	32
HLA-A*30:02	1	2	9	8	LNSGDSKV	9405.89	19		HLA-B*40:02	2	1	9	9	KLNSGLSKV	19048.5	33
HLA-A*68:02	1	2	9	8	LNSGDSKV	10170.9	6.4		HLA-B*27:05	1	1	8	8	KLNSGDSK	24406.2	34
HLA-A*02:01	1	2	9	8	LNSGDSKV	10285.1	31		HLA-B*08:01	2	1	9	9	KLNSGLSKV	26034.5	29
HLA-A*30:02	2	2	9	8	LNSGLSKV	10899.3	22		HLA-B*27:05	2	2	9	8	LNSGLSKV	26151.7	36
HLA-A*02:01	2	1	8	8	KLNSGLSK	11020.7	33		HLA-B*35:01	2	2	9	8	LNSGLSKV	26522.8	18
HLA-A*03:01	2	1	8	8	KLNSGLSK	11504.8	4.2		HLA-B*40:02	1	1	9	9	KLNSGDSKV	29367	41
HLA-A*68:02	2	2	9	8	LNSGLSKV	12455.5	8.2		HLA-B*57:01	2	1	9	9	KLNSGLSKV	31319.9	26
HLA-A*03:01	1	1	8	8	KLNSGDSK	13736.6	6.5		HLA-B*18:01	1	1	8	8	KLNSGDSK	31576.2	56
HLA-A*68:02	2	1	9	9	KLNSGLSKV	14407.5	38		HLA-B*18:01	2	1	8	8	KLNSGLSK	31576.2	56
HLA-A*68:02	1	1	9	9	KLNSGDSKV	14982.7	39		HLA-B*40:01	1	2	9	8	LNSGDSKV	33288.9	48
HLA-A*01:01	1	1	8	8	KLNSGDSK	17739.4	23		HLA-B*57:01	1	1	9	9	KLNSGDSKV	36376.4	28
HLA-A*29:02	1	1	8	8	KLNSGDSK	18350.6	17		HLA-B*07:02	2	1	9	9	KLNSGLSKV	37660.8	28
HLA-A*29:02	2	1	8	8	KLNSGLSK	18350.6	17		HLA-B*08:01	1	1	9	9	KLNSGDSKV	38864.2	35
HLA-A*23:01	2	1	9	9	KLNSGLSKV	18511	23		HLA-B*07:02	1	1	9	9	KLNSGDSKV	41484.9	29
HLA-A*01:01	2	1	8	8	KLNSGLSK	18618.3	24		HLA-B*53:01	1	2	9	8	LNSGDSKV	42500.1	38
HLA-A*11:01	2	1	9	9	KLNSGLSKV	23512.6	28		HLA-B*27:05	2	1	9	9	KLNSGLSKV	45980.1	34
HLA-A*02:01	1	1	8	8	KLNSGDSK	23616.2	52		HLA-B*51:01	2	1	9	9	KLNSGLSKV	45986.5	29
HLA-A*29:02	1	1	9	9	KLNSGDSKV	28758.1	36		HLA-B*40:02	2	1	8	8	KLNSGLSK	50655.9	69
HLA-A*29:02	2	1	9	9	KLNSGLSKV	31605.3	39		HLA-B*40:02	1	1	8	8	KLNSGDSK	52921.2	71
HLA-A*23:01	1	1	9	9	KLNSGDSKV	37362	34		HLA-B*53:01	1	1	9	9	KLNSGDSKV	57000.7	44
HLA-A*29:02	1	2	9	8	LNSGDSKV	37380.9	39		HLA-B*44:03	2	1	9	9	KLNSGLSKV	60185.2	37
HLA-A*01:01	2	2	9	8	LNSGLSKV	37665.2	43		HLA-B*44:03	1	2	9	8	LNSGDSKV	64914.2	79
HLA-A*29:02	2	2	9	8	LNSGLSKV	39962.3	43		HLA-B*44:03	2	2	9	8	LNSGLSKV	64914.2	79
HLA-A*24:02	2	1	9	9	KLNSGLSKV	46412	41		HLA-B*53:01	2	2	9	8	LNSGLSKV	65071.4	67
HLA-A*24:02	2	1	8	8	KLNSGLSK	48768.6	58		HLA-B*08:01	1	2	9	8	LNSGDSKV	67925.1	73
HLA-A*01:01	1	1	9	9	KLNSGDSKV	50646.6	30		HLA-B*44:03	1	1	9	9	KLNSGDSKV	72692.6	41
HLA-A*01:01	2	1	9	9	KLNSGLSKV	52426.4	30		HLA-B*35:01	2	1	8	8	KLNSGLSK	73218.4	58
HLA-A*11:01	2	2	9	8	LNSGLSKV	54545.6	59		HLA-B*51:01	2	1	8	8	KLNSGLSK	74377.2	67
HLA-A*23:01	2	1	8	8	KLNSGLSK	55769.9	68		HLA-B*27:05	1	2	9	8	LNSGDSKV	76120.2	67
HLA-A*11:01	1	2	9	8	LNSGDSKV	55816.2	59		HLA-B*51:01	1	1	9	9	KLNSGDSKV	78276.2	41
HLA-A*68:02	1	1	8	8	KLNSGDSK	56280.8	53		HLA-B*35:01	1	1	8	8	KLNSGDSK	78454.9	62
HLA-A*11:01	1	1	9	9	KLNSGDSKV	56532.7	42		HLA-B*51:01	2	2	9	8	LNSGLSKV	80064.5	70
HLA-A*03:01	1	2	9	8	LNSGDSKV	59412.8	88		HLA-B*27:05	1	1	9	9	KLNSGDSKV	81202.6	47
HLA-A*03:01	2	2	9	8	LNSGLSKV	59549.8	88		HLA-B*53:01	2	1	8	8	KLNSGLSK	81920	81
HLA-A*24:02	2	2	9	8	LNSGLSKV	59722.8	64		HLA-B*40:01	2	1	9	9	KLNSGLSKV	97476.5	38
HLA-A*24:02	1	2	9	8	LNSGDSKV	64884.4	66		HLA-B*53:01	2	1	9	9	KLNSGLSKV	99055.8	55
HLA-A*02:06	2	1	8	8	KLNSGLSK	70654.5	77		HLA-B*40:01	1	1	9	9	KLNSGDSKV	99517.6	38
HLA-A*26:01	1	1	8	8	KLNSGDSK	77001.6	65		HLA-B*14:02	2	1	9	9	KLNSGLSKV	106918	91
HLA-A*26:01	2	1	8	8	KLNSGLSK	77179.2	66		HLA-B*14:02	1	1	9	9	KLNSGDSKV	111186	91
HLA-A*26:01	1	2	9	8	LNSGDSKV	80260.2	74		HLA-B*53:01	1	1	8	8	KLNSGDSK	115449	95
HLA-A*26:01	2	2	9	8	LNSGLSKV	80260.2	74		HLA-B*51:01	1	1	8	8	KLNSGDSK	118152	82
HLA-A*68:02	2	1	8	8	KLNSGLSK	86968.1	76		HLA-B*35:01	1	1	9	9	KLNSGDSKV	136956	70
HLA-A*24:02	1	1	9	9	KLNSGDSKV	111078	64		HLA-B*44:03	1	1	8	8	KLNSGDSK	170349	99
HLA-A*24:02	1	1	8	8	KLNSGDSK	123920	82		HLA-B*44:03	2	1	8	8	KLNSGLSK	170349	99
HLA-A*23:01	1	1	8	8	KLNSGDSK	127174	92		HLA-B*18:01	2	1	9	9	KLNSGLSKV	195452	71
HLA-A*02:06	1	1	8	8	KLNSGDSK	127685	89		HLA-B*48:01	2	1	9	9	KLNSGLSKV	234747	44
HLA-A*26:01	2	1	9	9	KLNSGLSKV	155815	46		HLA-B*48:01	1	1	9	9	KLNSGDSKV	243557	44
HLA-A*68:01	1	1	9	9	KLNSGDSKV	157939	75		HLA-B*08:01	2	2	9	8	LNSGLSKV	257057	95
HLA-A*68:01	2	1	9	9	KLNSGLSKV	176803	77		HLA-B*18:01	1	1	9	9	KLNSGDSKV	287105	79
HLA-A*23:01	2	2	9	8	LNSGLSKV	177582	97		HLA-B*35:01	2	1	9	9	KLNSGLSKV	301703	82
HLA-A*23:01	1	2	9	8	LNSGDSKV	182978	97		HLA-B*39:01	2	1	9	9	KLNSGLSKV	369318	56
HLA-A*26:01	1	1	9	9	KLNSGDSKV	443210	65		HLA-B*39:01	1	1	9	9	KLNSGDSKV	452272	59
HLA-A*25:01	2	1	9	9	KLNSGLSKV	1.49307e+06	41		HLA-B*46:01	2	1	9	9	KLNSGLSKV	542350	29
HLA-A*25:01	1	1	9	9	KLNSGDSKV	7.71045e+06	60		HLA-B*38:01	1	1	9	9	KLNSGDSKV	594388	47
									HLA-B*46:01	1	1	9	9	KLNSGDSKV	778538	33
									HLA-B*38:01	2	1	9	9	KLNSGLSKV	1.24758e+06	57
									HLA-B*35:03	2	1	9	9	KLNSGLSKV	6.71723e+06	99
									HLA-B*35:03	1	1	9	9	KLNSGDSKV	8.8959e+06	100

## Sheet: Fig 2a
	Groups	peptide (nM)	fluoresence intensity (MFI)		avg.	SD
	Blank	1	218	232	225	9.89949
		3	265	234	249.5	21.9203
		8.9	304	215	259.5	62.9325
	CMV pp65	1	680	854	767	123.037
		3	21828	34420	28124	8903.89
		8.9	82855	82470	82662.5	272.236
	Negative	1	326	262	294	45.2548
		3	354	367	360.5	9.19239
		8.9	527	445	486	57.9828
	UC-100	1	7711	4046	5878.5	2591.55
		3	90472	90740	90606	189.505
		8.9	149387	150628	150008	877.52
	UC-152	1	1390	1686	1538	209.304
		3	43519	38014	40766.5	3892.62
		8.9	174395	169376	171886	3548.97

## Sheet: Fig 2b
	Groups	tube	tetramer-CD8+ (%)	avg.	SE
	unstained cells	tube 1	---	0	---
	CD8+ FITC mono-staining	tube 2	0	0	---
	NC (Negative control)	tube 3	1.1	1.23333	0.133333
		tube 4	1.1
		tube 5	1.5
	UC-100	tube 9	4.6	3.46667	0.611919
		tube 10	3.3
		tube 11	2.5
	UC-152	tube 12	3.7	4.5	1.05987
		tube 13	3.2
		tube 14	6.6

## Sheet: Fig 2c
	Groups	tube	Dextramer-CD4+ (MFI)	avg.	SE	T test
	unstain cells		8707
	CD4 stain		9545
	no peptide	1	16865	12832	2025.13	1
		2	11139
		3	10492
	UC-100	1	41542	39877.3	852.717	0.000250319
		2	39366
		3	38724
	UC-152	1	42576	34458.7	4138.37	0.00934997
		2	29000
		3	31800

## Sheet: Fig 2d
	UC-100	IFNr			IL-4
	nM	MFI	Avg.	SE	MFI	Avg.	SE
	0	2902	2895.67	318.42	1436	1849	250.14
		3444			2300
		2341			1811
	0.4	2209	2369	223.79	2082	2062.33	54.3
		2087			2145
		2811			1960
	2	2978	2413.33	282.43	2330	2147	93.64
		2144			2021
		2118			2090
	10	2952	2610.33	175.89	2552	2266.67	169.96
		2367			1964
		2512			2284
	50	3081	3010	136.06	2407	2385.33	32.19
		3202			2427
		2747			2322
	250	3387	3375	136.96	1936	1901.67	32.84
		3132			1836
		3606			1933

## Sheet: Fig 2e 
	UC-152	IFNr			IL-4
	nM	MFI	Avg.	SE	MFI	Avg.	SE
	0	2811	2496.67	373.31	2122	2157.33	28.17
		1753			2213
		2926			2137
	0.4	2135	2038.67	75.41	2032	1897.33	69.25
		1890			1802
		2091			1858
	2	2924	2051.33	437.01	2179	1937.67	156.64
		1573			1990
		1657			1644
	10	3178	2748	220.92	2345	2233	82.11
		2445			2073
		2621			2281
	50	2921	2431.33	248.99	2494	1925.33	323.16
		2265			1907
		2108			1375
	250	2600	2806	199.54	1759	1833	39.12
		3205			1848
		2613			1892

## Sheet: Fig 3a
																								*The negative number as 0.
	Groups		OD490				avg.	SE	cytotoxicity (%)				% avg.	SE	OD 490 background (peptide + target cells )		avg.	SE	cytotoxicity % background (peptide + target cells )		% avg.	SE	cytotoxicity % background depletion		% avg.	SE
	Target cells only (N=7)		0.42	0.407	0.398	0.4	0.413714	0.0144564	0.249801	0	0	0	0.502847	0.462553
			0.38	0.496	0.395				0	3.27013	0
	system control (N=3)		2.947	2.907	2.936		2.93	0.0119304	100.676	99.086	100.238		100	0.474126
			Repeat 1	Repeat 2					Repeat 1	Repeat 2					Repeat 1	Repeat 2			Repeat 1	Repeat 2			Repeat 1	Repeat 2
	No peptide	E:T= 1:1	0.409	0.459			0.434	0.025	0	1.7997			0.899852	0.899852	0.561	0.423	0.492	0.069	5.8533	0.369025	3.11116	2.74214	0	0	0	0
		E:T= 3:1	0.429	0.474			0.4515	0.0225	0.607471	2.39582			1.50165	0.894175									0	0	0	0
		E:T= 9:1	0.496	0.456			0.476	0.02	3.27013	1.68048			2.4753	0.794822									0.158964	0	0.0794822	0.0794822
		E:T= 27:1	0.579	0.507			0.543	0.036	6.56864	3.70728			5.13796	1.43068									3.45748	0.596117	2.0268	1.43068
	UC-100_9 nM	E:T= 1:1	0.422	0.464			0.443	0.021	0.329284	1.99841			1.16385	0.834563	0.438	0.492	0.465	0.027	0.965141	3.11116	2.03815	1.07301	0	0	0	0
		E:T= 3:1	0.435	0.479			0.457	0.022	0.845918	2.59453			1.72022	0.874305									0	0.556376	0.278188	0.278188
		E:T= 9:1	0.499	0.458			0.4785	0.0205	3.38935	1.75996			2.57466	0.814693									1.3512	0	0.675599	0.675599
		E:T= 27:1	0.589	0.556			0.5725	0.0165	6.96605	5.65459			6.31032	0.655728									4.9279	3.61644	4.27217	0.655728
	UC-100_27 nM	E:T= 1:1	0.425	0.416			0.4205	0.0045	0.448507	0.0908368			0.269672	0.178835	0.462	0.393	0.4275	0.0345	1.91893	0	0.959464	0.959464	0	0	0	0
		E:T= 3:1	0.466	0.47			0.468	0.002	2.07789	2.23686			2.15737	0.0794822									1.11843	1.27739	1.19791	0.0794822
		E:T= 9:1	0.517	0.5			0.5085	0.0085	4.10469	3.42909			3.76689	0.337799									3.14523	2.46963	2.80743	0.337799
		E:T= 27:1	0.559	0.575			0.567	0.008	5.77382	6.40967			6.09175	0.317929									4.81435	5.45021	5.13228	0.317929

## Sheet: Fig 3b
																								*The negative number as 0.
	Groups		OD490				avg.	SE	cytotoxicity (%)				% avg.	SE	OD 490 background (peptide + target cells )		avg.	SE	cytotoxicity % background (peptide + target cells )		% avg.	SE	cytotoxicity % background depletion		% avg.	SE
	Target cells only (N=7)		0.42	0.407	0.398	0.4	0.413714	0.0144564	0.249801	0	0	0	0.502847	0.462553
			0.38	0.496	0.395				0	3.27013	0
	system control (N=3)		2.947	2.907	2.936		2.93	0.0119304	100.676	99.086	100.238		100	0.474126
			Repeat 1	Repeat 2					Repeat 1	Repeat 2					Repeat 1	Repeat 2			Repeat 1	Repeat 2			Repeat 1	Repeat 2
	No peptide	E:T= 1:1	0.409	0.459			0.434	0.025	0	1.7997			0.899852	0.899852	0.561	0.423	0.492	0.069	5.8533	0.369025	3.11116	2.74214	0	0	0	0
		E:T= 3:1	0.429	0.474			0.4515	0.0225	0.607471	2.39582			1.50165	0.894175									0	0	0	0
		E:T= 9:1	0.496	0.456			0.476	0.02	3.27013	1.68048			2.4753	0.794822									0.158964	0	0.0794822	0.0794822
		E:T= 27:1	0.579	0.507			0.543	0.036	6.56864	3.70728			5.13796	1.43068									3.45748	0.596117	2.0268	1.43068
	UC-152_9 nM	E:T= 1:1	0.433	0.429			0.431	0.002	0.766436	0.607471			0.686954	0.0794822	0.498	0.445	0.4715	0.0265	3.34961	1.24333	2.29647	1.05314	0	0	0	0
		E:T= 3:1	0.47	0.517			0.4935	0.0235	2.23686	4.10469			3.17077	0.933916									0	1.80822	0.90411	0.90411
		E:T= 9:1	0.496	0.506			0.501	0.005	3.27013	3.66754			3.46883	0.198706									0.973657	1.37107	1.17236	0.198706
		E:T= 27:1	0.552	0.563			0.5575	0.0055	5.49563	5.93278			5.7142	0.218576									3.19916	3.63631	3.41774	0.218576
	UC-152_27 nM	E:T= 1:1	0.438	0.453			0.4455	0.0075	0.965141	1.56126			1.2632	0.298058	0.426	0.419	0.4225	0.0035	0.488248	0.21006	0.349154	0.139094	0.615987	1.2121	0.914046	0.298058
		E:T= 3:1	0.452	0.457			0.4545	0.0025	1.52152	1.72022			1.62087	0.0993528									1.17236	1.37107	1.27172	0.0993528
		E:T= 9:1	0.517	0.517			0.517	0	4.10469	4.10469			4.10469	0									3.75554	3.75554	3.75554	0
		E:T= 27:1	0.598	0.508			0.553	0.045	7.32372	3.74702			5.53537	1.78835									6.97457	3.39787	5.18622	1.78835

## Sheet: Fig 4a and 4d
		Total IgG
			pre-dose				post-dose
			O.D 450 nm	total IgG (ng/mL)	IgG (ug/mL)		O.D 450 nm		Total IgG (ng/mL)		Ave.	IgG (ug/mL)
	dilution factor			100000					100000
			Repeat 1			Ave.	Repeat 1	Repeat 2					Ave.
Fig. 4a	UC-100 50 ug	1	0.19615	2.038	203.8	186.2	0.30805	0.31285	3.53	3.592	3.561	356.1	339.4
		2	0.18755	1.919	191.9		0.28005	0.28755	3.163	3.262	3.212	321.2
		3	0.16685	1.629	162.9		0.29745	0.30015	3.391	3.427	3.409	340.9
						Ave.							Ave.
Fig. 4 d	UC-152 400 ug	17	0.13885	1.224	122.4	127.267	0.24545	0.26015	2.705	2.9	2.803	280.3	339.8
		18	0.15535	1.465	146.5		0.28285	0.30755	3.2	3.523	3.362	336.2
		19	0.13245	1.129	112.9		0.31385	0.29505	3.605	3.36	3.483	348.3
		20	no determination				0.33305	0.34675	3.855	4.033	3.944	394.4

## Sheet: Fig 4b and 4e
		peptide-specific IgG
				pre-dose				post-dose
				O.D 450 nm				O.D 450 nm
				Repeat 1	Repeat 2	Ave.	Ave.	Repeat 1	Repeat 2	Ave.	Ave.
	Fig. 4b	UC-100 50 ug	#1	0.0185	0.0232	0.02085	0.0257	0.0434	0.0338	0.0386	0.0414667
			#2	0.0366	0.0342	0.0354		0.0483	0.0453	0.0468
			#3	0.0264	0.0153	0.02085		0.0415	0.0365	0.039
				pre-dose				post-dose
				O.D 450 nm				O.D 450 nm
				Repeat 1	Repeat 2	Ave.	Ave.	Repeat 1	Repeat 2	Ave.	Ave.
	Fig. 4e	UC-152 400 ug	#17	0.0449375	0.0248375	0.0348875	0.023175	0.0487375	0.0403375	0.0445375	0.0427125
			#18	0.0165375	0.0175375	0.0170375		0.0439375	0.0467375	0.0453375
			#19	0.0152375	0.0145375	0.0148875		0.0403375	0.0387375	0.0395375
			#20	0.0218375	0.0299375	0.0258875		0.0414375	0.0414375	0.0414375

[truncated: 9 more sheets: Fig 4c and 4f, Fig 4g, Fig 4h, Fig 5a, Fig 5b, Fig 5c, Fig 5d, Fig 5e, Fig 5f]
